# Supplementary material for: Energy transfer between molecules from core to shell in one-dimensional coaxial electrospun nanofibres
Source: Royal Society of Chemistry journal article supplement (doi:10.1039/d2qm01196d), 2023-01-01
Supplement: d2qm01196d1.pdf [file d2qm01196d1.pdf]

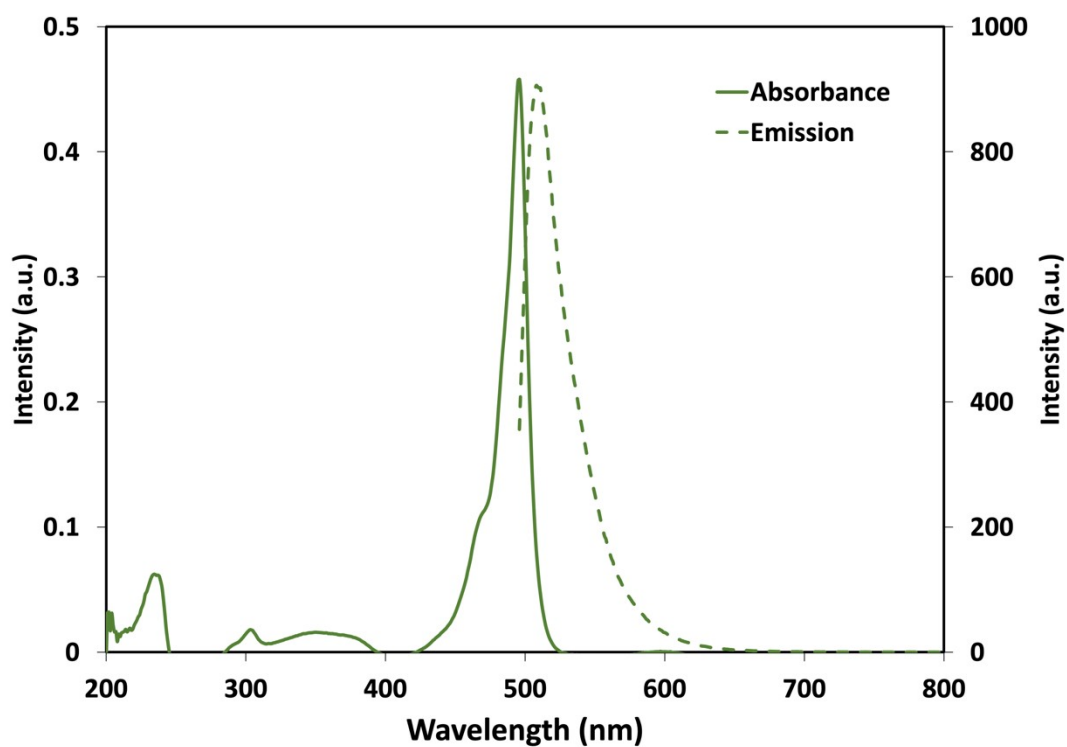

Figure S1. Normalized absorbance (solid) and emission (dashed) of BODIPY in isopropanol

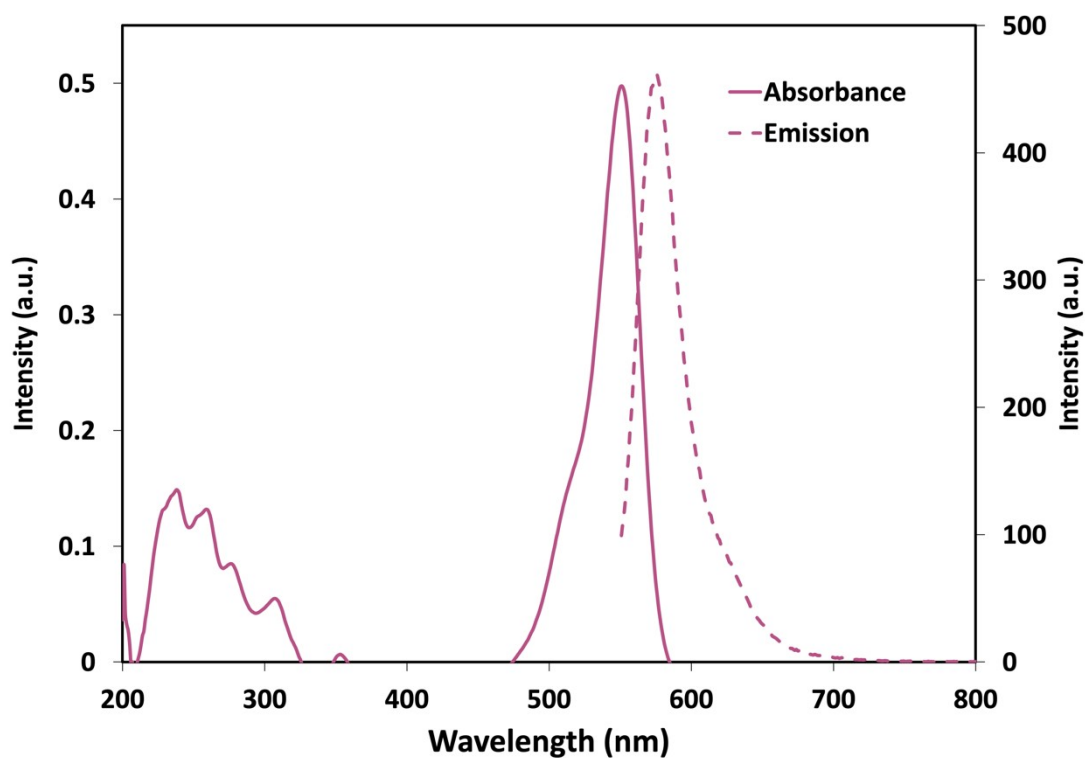

Figure S2. Normalized absorbance (solid) and emission (dashed) of Rhodamine in isopropanol

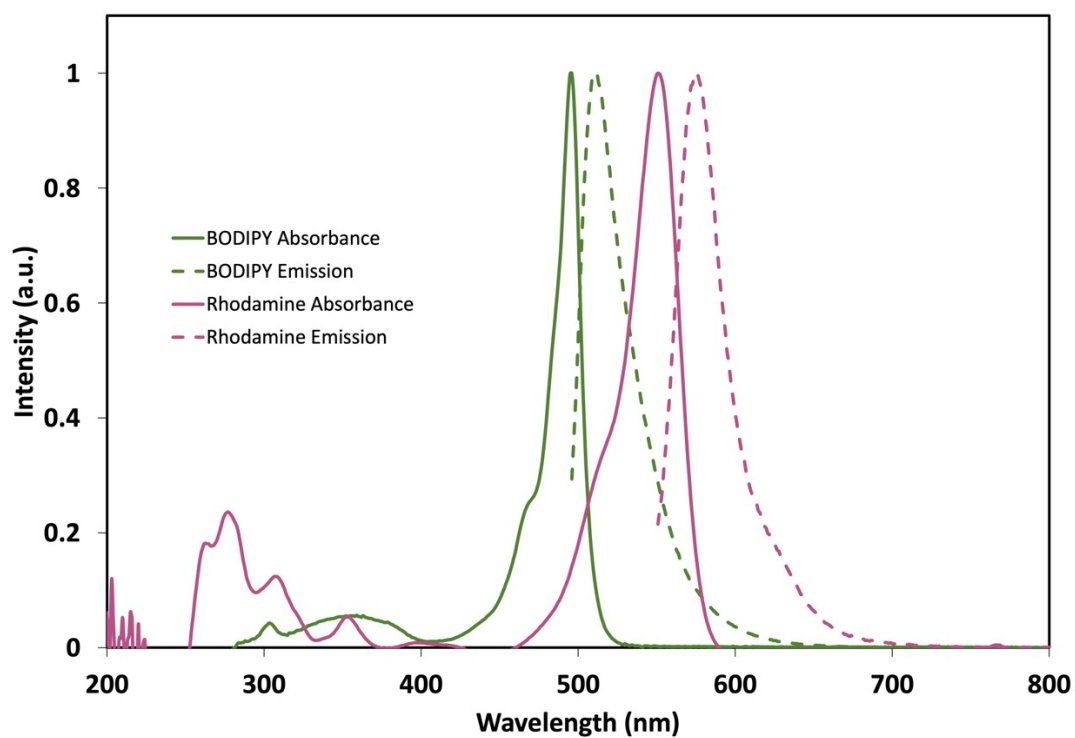

Figure S3. Normalized absorbance and emission spectra for BODIPY and Rhodamine in PVP/IPA across the full spectrum (200-800 nm)

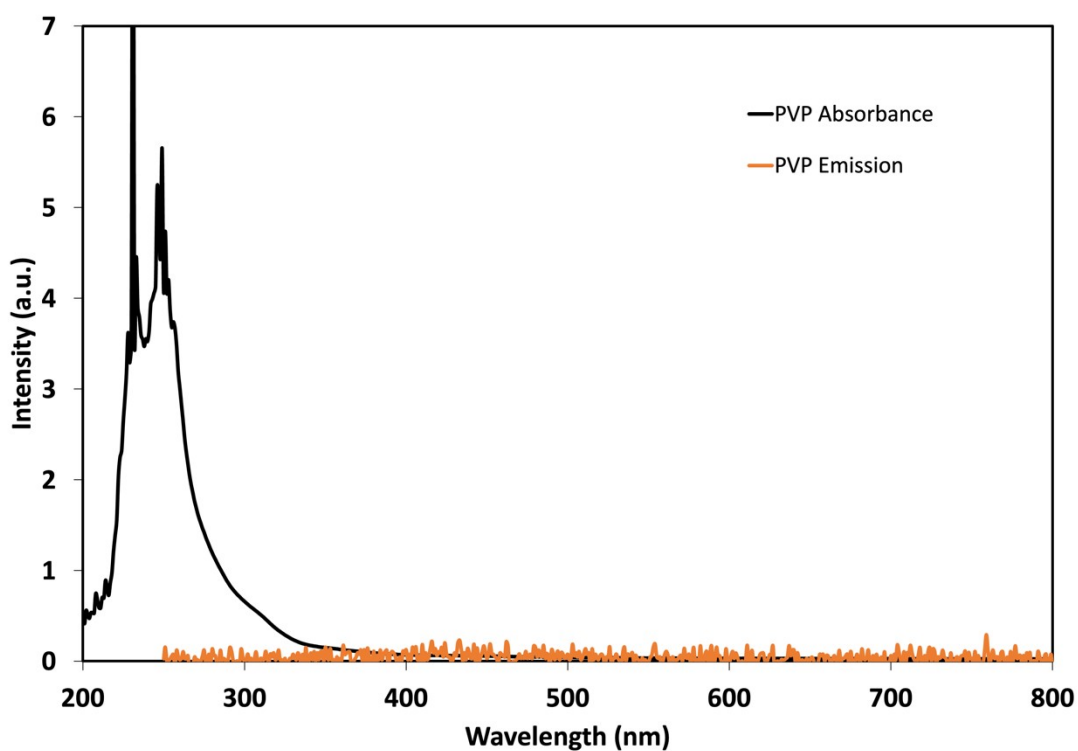

Figure S4. Absorbance of PVP in isopropanol

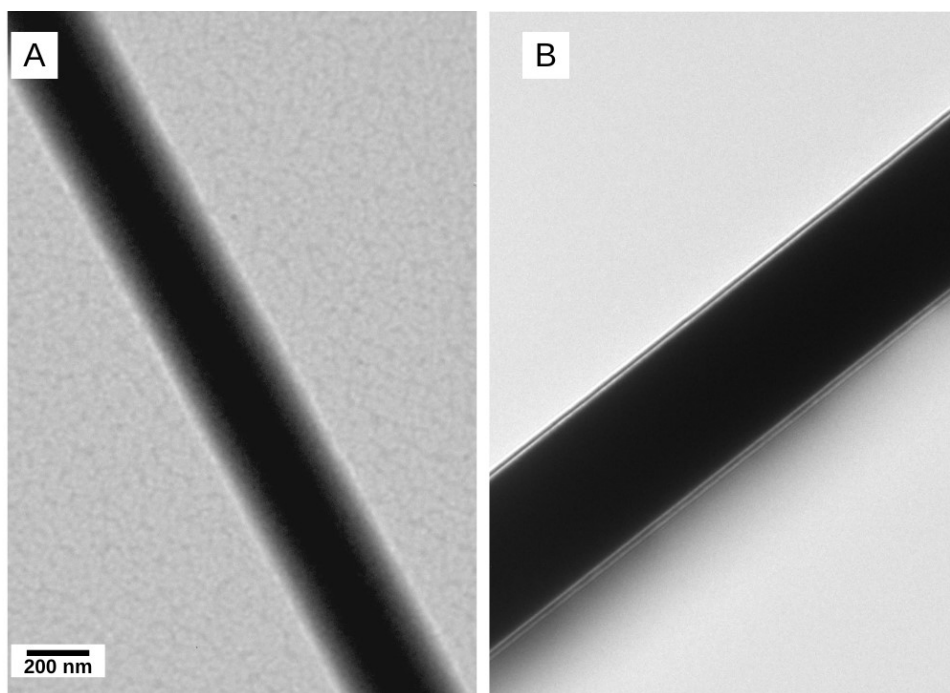

Figure S5. Comparative TEM images of coaxial (A) and monoaxial fibres (B)

#### VIDEO ATTACHMENT

rotate 90 twice.mp4

Description:

Laser Scanning Confocal Microscope (LSCM) video of B-PVP@Rh-PVP nanofibre cross section. The fluorescent yellow represents the BODIPY in the core and the fluorescent red represents the rhodamine in the shell.
